# Supplementary material for: Angiotensin II and the ERK pathway mediate the induction of myocardin by hypoxia in cultured rat neonatal cardiomyocytes
Source: PubMed Central journal article supplement — Clin Sci (Lond). 2010 Jun 22;119(Pt 7):273–82. doi: 10.1042/CS20100084 (PMC2890999; doi:10.1042/cs20100084), 2010-06-22
Supplement: cs1190273add.pdf [file cs1190273add.pdf]

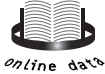

■ SUPPLEMENTARY ONLINE DATA

# Angiotensin II and the ERK pathway mediate the induction of myocardin by hypoxia in cultured rat neonatal cardiomyocytes

Chiung-Zuan CHIU\*†‡, Bao-Wei WANG‡, Tun-Hui CHUNG† and Kou-Gi SHYU\*‡

\*Graduate Institute of Clinical Medicine, College of Medicine, Taipei Medical University, Taipei, Taiwan, †School of Medicine, Fu-Jen Catholic University, Taipei County, Taiwan, and ‡Division of Cardiology, Shin-Kong Wu Ho-Su Memorial Hospital, Taipei, Taiwan

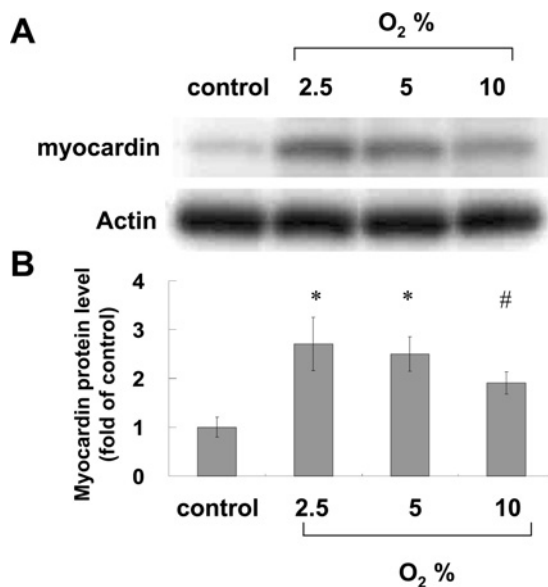

**Figure S1 Hypoxia increases the expression of myocardin protein in cultured rat neonatal cardiomyocytes**

Neonatal cardiomyocytes were subjected to normoxia or different degrees of hypoxia for 4 h, and total cell lysates were immunoblotted with the anti-myocardin antibody. Actin is used to show equal amounts of protein loading in each lane. #*P* < 0.05 and \**P* < 0.01 compared with normoxia control (*n* = 3).

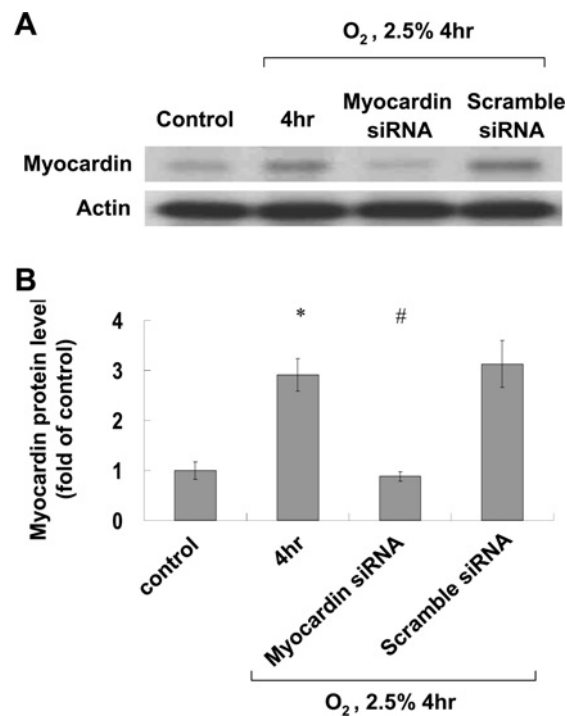

**Figure S2 Effect of myocardin siRNA on myocardin expression in cardiomyocytes under 2.5% O<sub>2</sub>**

Myocardin protein levels increased and reached a peak after hypoxia for 4 h, which was suppressed by myocardin siRNA. Actin is used to show for equal amounts of protein loading in each lane. \**P* < 0.01 compared with normoxia control; #*P* < 0.01 compared with 4 h (*n* = 3).

## Myocardin confocal

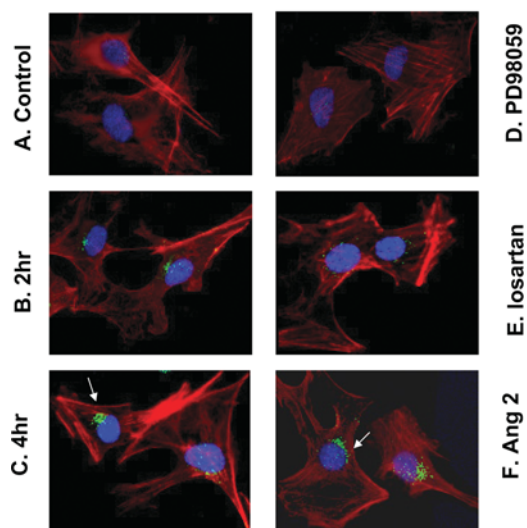

**Figure S3 Confocal microscopy identifies the expression of myocardin in the nucleus of neonatal cardiomyocytes after hypoxia**

(A) Cardiomyocytes under normoxia. (B and C) Myocardin protein (green) levels increased in the nucleus (blue) of neonatal cardiomyocytes from 2 to 4 h. (D and E) ERK pathway inhibitor (PD98059) and ARB (losartan) suppressed the expression of myocardin. (F) AngII increased the expression of myocardin in the nuclei of neonatal cardiomyocytes.

Received 4 February 2010/5 May 2010; accepted 6 May 2010  
Published as Immediate Publication 6 May 2010, doi:10.1042/CS20100084
